# Supplementary material for: β-COP Regulates TWIK1/TREK1 Heterodimeric Channel-Mediated Passive Conductance in Astrocytes
Source: MDPI journal article supplement (doi:10.3390/cells11203322), 2022-10-21
Supplement: s1 [file s1]

**A**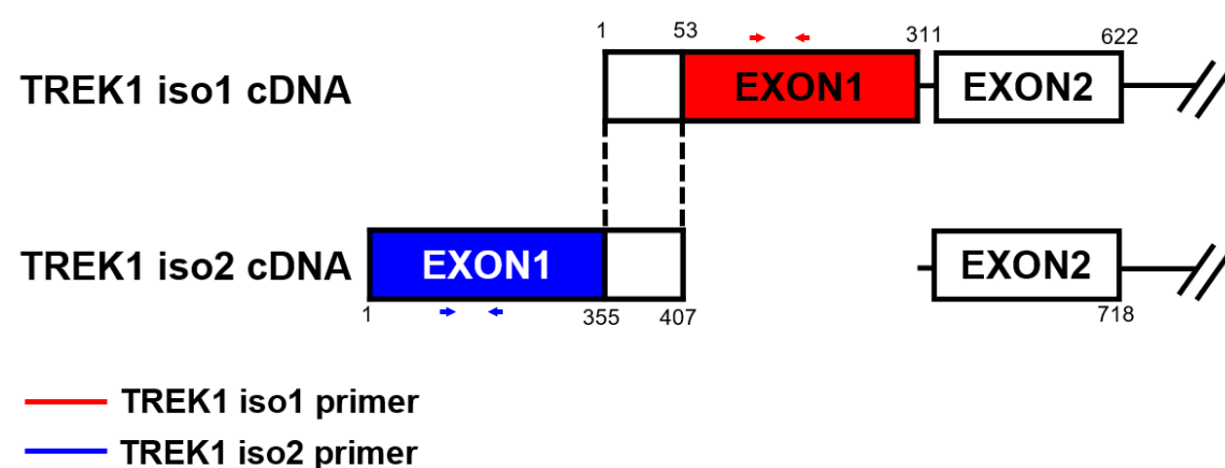**B**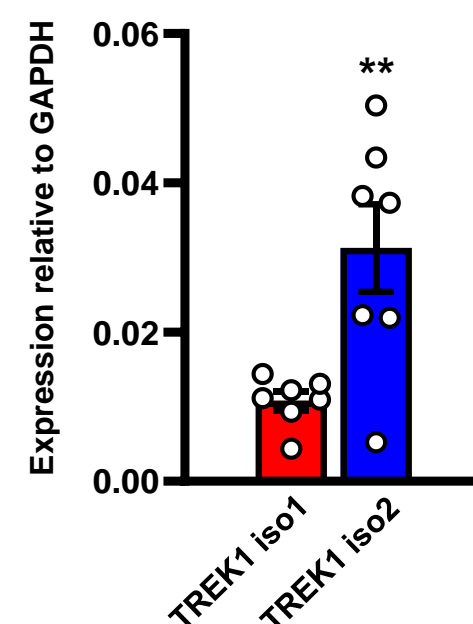

**Figure S1. Relative expression of TREK1 isoforms in Astrocytes.** (A) Schematic diagram of the cDNA for each TREK1 isoform. Primers for qRT-PCR, indicated by small arrows, were designed in exon1 of each isoform. (B) Bar graphs are qRT-PCR results using each primer. Normalized with GAPDH(n=7). All values are mean  $\pm$  SEM (\*\* $p < 0.01$ ). qRT-PCR, quantitative reverse transcription polymerase chain reaction; SEM, standard error of the mean; TWIK1, tandem of pore domains in a weak inward rectifying K<sup>+</sup> channel; TREK1, TWIK-related K<sup>+</sup> channel 1; GAPDH, glyceraldehyde 3-phosphate dehydrogenase.

**A**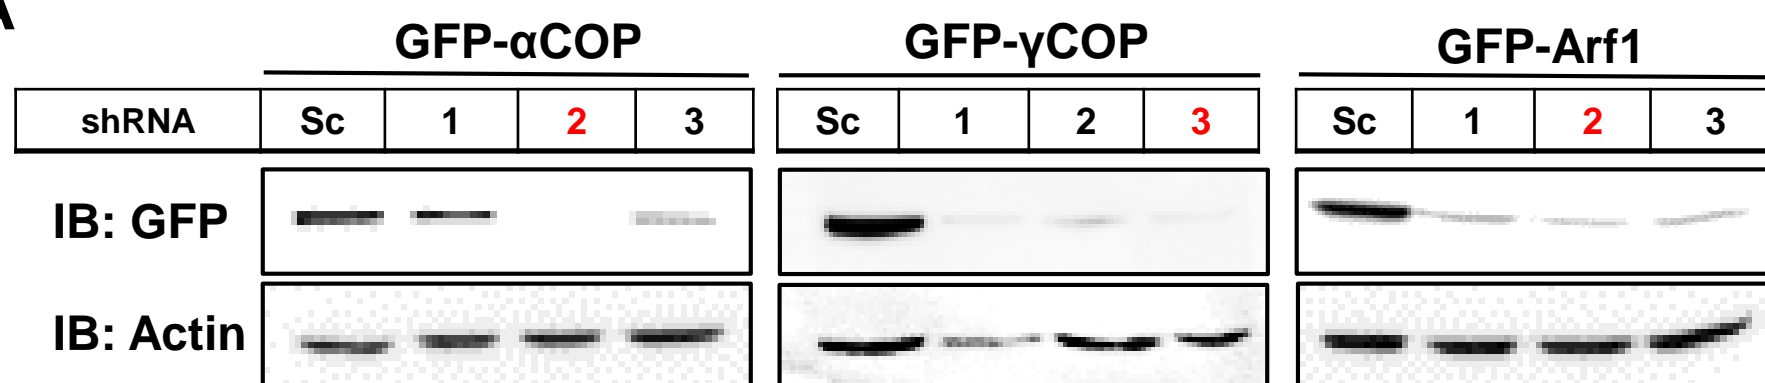**B**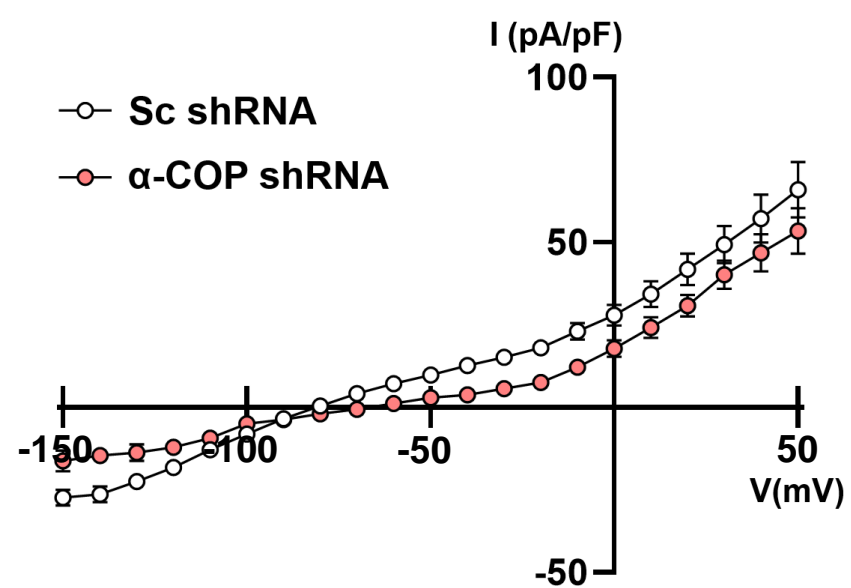**C**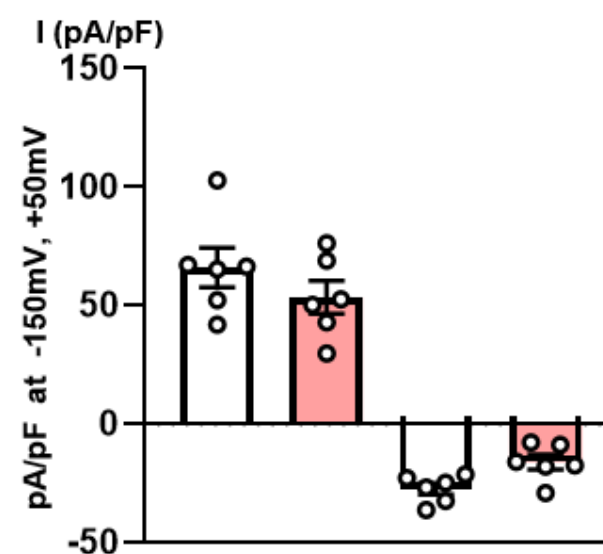**D**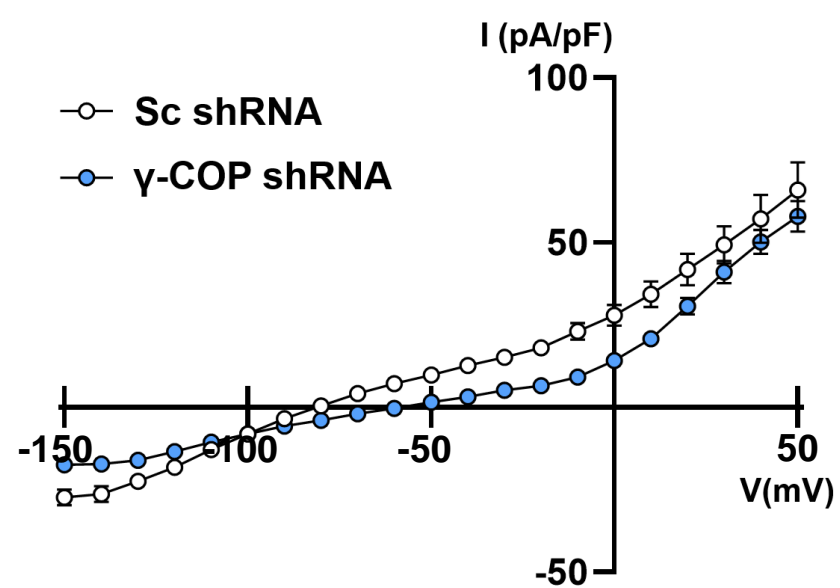**E**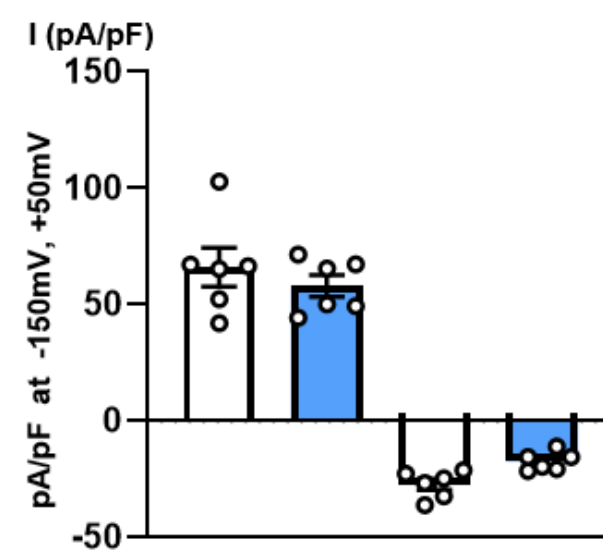**F**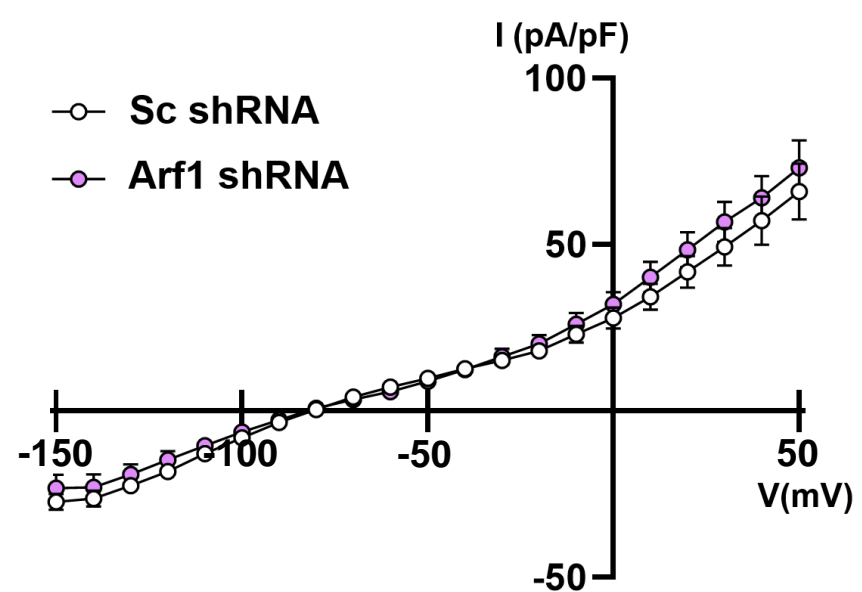**G**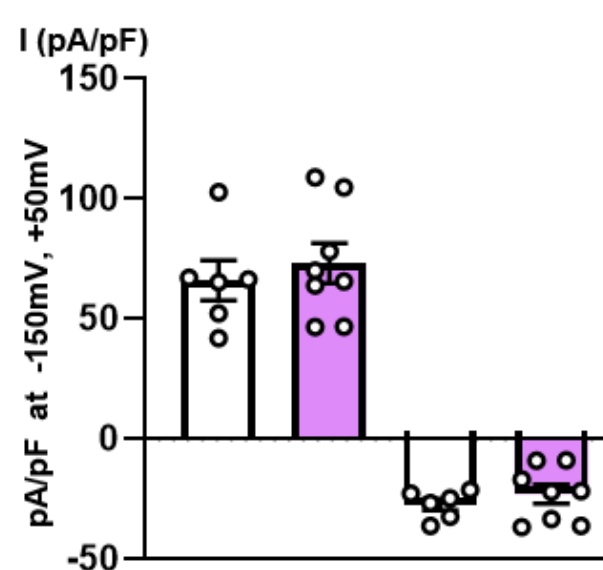

**Figure S2. Other COP1 subunits do not affect the K<sup>+</sup> current in astrocytes.** (A)  $\alpha$ -COP,  $\gamma$ -COP, Arf1 shRNA validation test in HEK293T cells. GFP-tagged  $\alpha$ -COP,  $\gamma$ -COP, and Arf1 were co-transfected with each of three specific shRNAs. The most efficient shRNA (red) was used in the experiment. (B), (D), (F) Average current-voltage (I-V) relationship of Sc shRNA (white),  $\alpha$ -COP shRNA (light orange),  $\gamma$ -COP shRNA (light sky), and Arf1 shRNA (light violet) transfected astrocytes. The voltage ramp-induced whole-cell current traces were recorded from each cell. (C), (E), (G) Bar graph at -150 mV and +50 mV in (B), (D), (F). All values are mean  $\pm$  SEM (\*\*\*)  $p < 0.001$ . SEM, standard error of the mean; COP, coat protein; COP1, coat protein complex 1; Arf1, ADP-ribosylation factor 1; TWIK1, tandem of pore domains in a weak inward rectifying K<sup>+</sup> channel; TREK1, TWIK-related K<sup>+</sup> channel 1; GFP, green fluorescent protein; Co-IP, co-immunoprecipitation; Sc, scrambled; HEK, human embryonic kidney.
